# Supplementary material for: Comparison of Saliva with Healthcare Workers- and Patient-Collected Swabs in the Diagnosis of COVID-19 in a Large Cohort
Source: Research Square preprint supplement (doi:10.21203/rs.3.rs-132301/v1), 2020-12-22
Supplement: Supplementary file 1 [file fd369a7ff0fc5612fb6ae670.docx]

**Figure 2:** **Comparison of Nasopharyngeal swab with saliva postivity in outpatinets**


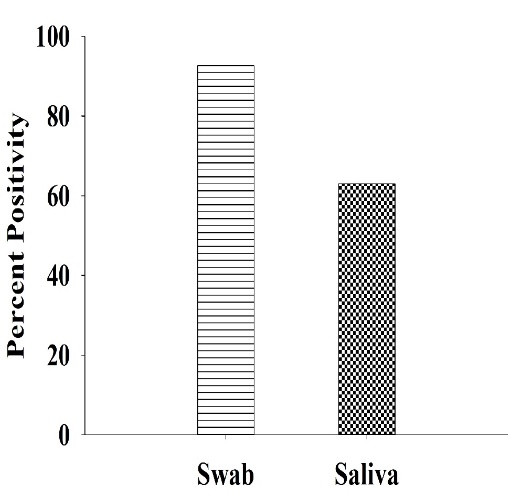

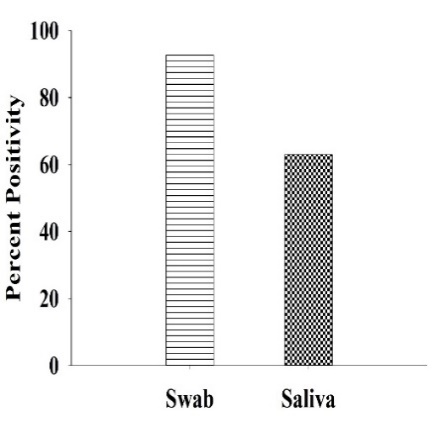
Nasopharyngeal swabs saliva were tested in outpatients:Left panel shows overall positivity of swabs to be higher in comparison to saliva. Middle panel shows comparison of saliva in swab positive patients with higher detection in swabs.Right panel shows higher positivity in symptomatic patients in comparison to asymptomatic patients.
